# Supplementary material for: Cutaneous Complications of mRNA and AZD1222 COVID-19 Vaccines: A Worldwide Review
Source: MDPI journal article supplement (doi:10.3390/microorganisms10030624), 2022-03-15
Supplement: s1 [file s1]

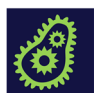

## Supplementary materials

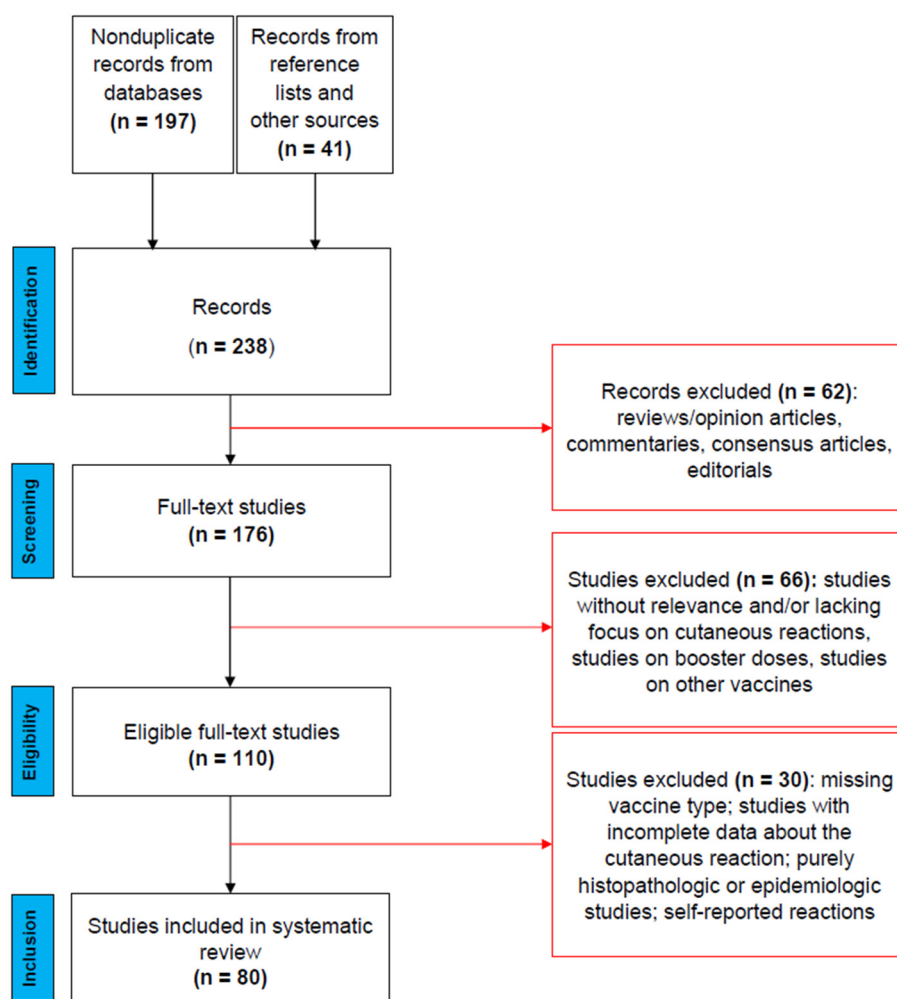

**Figure S1.** Flow diagram of study selection performed according to Preferred Reporting Items for Systematic Reviews and Meta-Analysis guidelines.
